# Supplementary material for: Validation and comparison of two NGS assays for the detection of EGFR T790M resistance mutation in liquid biopsies of NSCLC patients
Source: PubMed Central journal article supplement (PMC5915090; doi:10.18632/oncotarget.24908), 2018-04-06
Supplement: oncotarget-09-18529-s001.pdf [file oncotarget-09-18529-s001.pdf]

## Validation and comparison of two NGS assays for the detection of EGFR T790M resistance mutation in liquid biopsies of NSCLC patients

### SUPPLEMENTARY MATERIALS

**Supplementary Table 1: Somatic variants of the multiplex reference standard and expected allele frequencies**

| Gene          | Variant            | Expected allelic frequency (%) |                       |                       |
|---------------|--------------------|--------------------------------|-----------------------|-----------------------|
|               |                    | 0.1% reference standard        | 1% reference standard | 5% reference standard |
| <i>EGFR</i>   | L858R              | 0.10                           | 1.00                  | 5.00                  |
| <i>EGFR</i>   | $\Delta$ E746-A750 | 0.10                           | 1.00                  | 5.00                  |
| <i>EGFR</i>   | T790M              | 0.10                           | 1.00                  | 5.00                  |
| <i>EGFR</i>   | V769_D770insASV    | 0.10                           | 1.00                  | 5.00                  |
| <i>KRAS</i>   | G12D               | 0.13                           | 1.30                  | 6.30                  |
| <i>NRAS</i>   | Q61K               | 0.13                           | 1.30                  | 6.30                  |
| <i>NRAS</i>   | A59T               | 0.13                           | 1.30                  | 6.30                  |
| <i>PIK3CA</i> | E545K              | 0.13                           | 1.30                  | 6.30                  |

**Supplementary Table 2: Clinical non-small cell lung cancer (NSCLC) samples analyzed in this study.** See\_Supplementary\_Table 2

**Supplementary Table 3: Reference samples (synthetic plasma) analyzed in this study.** See\_Supplementary\_Table 3
